# Supplementary material
Source: publisher site journal article supplement (https://www.dovepress.com/article/233834)
Supplement: Supplementary file 1 [file get_supplementary_file.php]

**Table S1.** Unadjusted and adjusted odds ratio for each model and variable (whole population)

|  | **Unadjusted OR** | | | | **Age + Sex Adjusted OR** | | | | **Age + Sex + BMI adjusted OR** | | | |
| --- | --- | --- | --- | --- | --- | --- | --- | --- | --- | --- | --- | --- |
|  | OR | Lower 95% CI | Higher 95% CI | p-value† | OR | Lower 95% CI | Higher 95% CI | p*-*value† | OR | Lower 95% CI | Higher 95% CI | p*-*value† |
| **CAD** |  |  |  |  |  |  |  |  |  |  |  |  |
| Liver density quartile (1 vs. 4) | 1.714 | 1.221 | 2.406 | **<0.01** | 1.588 | 1.124 | 2.244 | **<0.01** | 1.358 | 0.946 | 1.947 | 0.10 |
| Age | - | - | - | - | 1.047 | 1.027 | 1.066 | <0.001 | 1.047 | 1.028 | 1.067 | <0.001 |
| Sex | - | - | - | - | 1.491 | 1.146 | 1.940 | <0.01 | 1.519 | 1.166 | 1.978 | <0.01 |
| BMI | - | - | - | - | - | - | - | - | 1.040 | 1.014 | 1.065 | <0.01 |
| **Diabetes** |  |  |  |  |  |  |  |  |  |  |  |  |
| Liver density quartile (1 vs. 4) | 2.963 | 1.753 | 5.007 | **<0.001** | 2.803 | 1.647 | 4.769 | **<0.001** | 1.612 | 0.922 | 2.818 | 0.09 |
| Age | - | - | - | - | 1.062 | 1.032 | 1.093 | <0.001 | 1.069 | 1.037 | 1.101 | <0.001 |
| Sex | - | - | - | - | 1.348 | 0.907 | 2.006 | 0.14 | 1.62 | 1.069 | 2.457 | 0.02 |
| BMI | - | - | - | - | - | - | - | - | 1.143 | 1.104 | 1.183 | <0.001 |
| **Heart Failure** |  |  |  |  |  |  |  |  |  |  |  |  |
| Liver density quartile (1 vs. 4) | 1.766 | 0.953 | 3.272 | 0.07 | 1.611 | 0.864 | 3.005 | 0.13 | 1.342 | 0.701 | 2.569 | 0.38 |
| Age | - | - | - | - | 1.050 | 1.014 | 1.087 | <0.01 | 1.051 | 1.015 | 1.088 | <0.01 |
| Sex | - | - | - | - | 1.688 | 1.026 | 2.777 | 0.04 | 1.730 | 1.050 | 2.849 | 0.03 |
| BMI | - | - | - | - | - | - | - | - | 1.046 | 1.002 | 1.093 | 0.04 |
| **Hypertension** |  |  |  |  |  |  |  |  |  |  |  |  |
| Liver density quartile (1 vs. 4) | 1.584 | 1.172 | 2.139 | **<0.01** | 1.656 | 1.217 | 2.254 | **<0.01** | 1.161 | 0.837 | 1.609 | 0.37 |
| Age | - | - | - | - | 1.053 | 1.036 | 1.07 | <0.001 | 1.054 | 1.037 | 1.072 | <0.001 |
| Sex | - | - | - | - | 0.729 | 0.584 | 0.91 | <0.01 | 0.740 | 0.590 | 0.929 | 0.01 |
| BMI | - | - | - | - | - | - | - | - | 1.093 | 1.068 | 1.119 | <0.001 |
| **Stroke** |  |  |  |  |  |  |  |  |  |  |  |  |
| Liver density quartile (1 vs. 4) | 2.073 | 1.021 | 4.209 | **0.04** | 2.197 | 1.073 | 4.496 | **0.03** | 2.353 | 1.111 | 4.984 | **0.03** |
| Age | - | - | - | - | 1.033 | 0.992 | 1.076 | 0.11 | 1.034 | 0.993 | 1.076 | 0.11 |
| Sex | - | - | - | - | 0.677 | 0.394 | 1.163 | 0.16 | 0.673 | 0.391 | 1.158 | 0.15 |
| BMI | - | - | - | - | - | - | - | - | 0.984 | 0.932 | 1.038 | 0.55 |

OR: Odds Ratio; CAD: Coronary Disease; BMI: body mass index. † Significant p-values for liver density are shown in bold.

**Table S2.** Unadjusted and adjusted odds ratio for each model and variable, **in men only**

|  | **Unadjusted OR** | | | | **Age Adjusted OR** | | | | **Age + BMI adjusted OR** | | | |
| --- | --- | --- | --- | --- | --- | --- | --- | --- | --- | --- | --- | --- |
|  | OR | Lower 95% CI | Higher 95% CI | p-value† | OR | Lower 95% CI | Higher 95% CI | p*-*value† | OR | Lower 95% CI | Higher 95% CI | p*-*value† |
| **CAD** |  |  |  |  |  |  |  |  |  |  |  |  |
| Liver density quartile (1 vs. 4) | 1.426 | 0.939 | 2.163 | 0.10 | 1.450 | 0.951 | 2.210 | 0.08 | 1.127 | 0.723 | 1.758 | 0.60 |
| Age | - | - | - | - | 1.052 | 1.029 | 1.076 | <0.001 | 1.053 | 1.029 | 1.077 | <0.001 |
| BMI | - | - | - | - | - | - | - | - | 1.066 | 1.031 | 1.103 | <0.001 |
| **Diabetes** |  |  |  |  |  |  |  |  |  |  |  |  |
| Liver density quartile (1 vs. 4) | 1.920 | 1.072 | 3.437 | **0.03** | 1.989 | 1.105 | 3.579 | **0.02** | 1.013 | 0.538 | 1.909 | 0.97 |
| Age | - | - | - | - | 1.067 | 1.031 | 1.105 | <0.001 | 1.079 | 1.040 | 1.119 | <0.001 |
| BMI | - | - | - | - | - | - | - | - | 1.195 | 1.137 | 1.255 | <0.001 |
| **Heart Failure** |  |  |  |  |  |  |  |  |  |  |  |  |
| Liver density quartile (1 vs. 4) | 1.418 | 0.677 | 2.967 | 0.35 | 1.457 | 0.693 | 3.063 | 0.32 | 1.049 | 0.481 | 2.286 | 0.90 |
| Age | - | - | - | - | 1.074 | 1.028 | 1.121 | <0.01 | 1.077 | 1.031 | 1.126 | <0.001 |
| BMI | - | - | - | - | - | - | - | - | 1.089 | 1.029 | 1.153 | <0.01 |
| **Hypertension** |  |  |  |  |  |  |  |  |  |  |  |  |
| Liver density quartile (1 vs. 4) | 1.668 | 1.137 | 2.447 | **<0.01** | 1.731 | 1.174 | 2.555 | **<0.01** | 1.093 | 0.719 | 1.662 | 0.68 |
| Age | - | - | - | - | 1.050 | 1.028 | 1.072 | <0.001 | 1.053 | 1.031 | 1.076 | <0.001 |
| BMI | - | - | - | - | - | - | - | - | 1.131 | 1.094 | 1.170 | <0.001 |
| **Stroke** |  |  |  |  |  |  |  |  |  |  |  |  |
| Liver density quartile (1 vs. 4) | 1.600 | 0.609 | 4.201 | 0.34 | 1.621 | 0.616 | 4.261 | 0.33 | 1.450 | 0.525 | 4.004 | 0.47 |
| Age | - | - | - | - | 1.038 | 0.982 | 1.097 | 0.18 | 1.039 | 0.983 | 1.098 | 0.18 |
| BMI | - | - | - | - | - | - | - | - | 1.029 | 0.951 | 1.114 | 0.48 |
|  |  |  |  |  |  |  |  |  |  |  |  |  |

OR: Odds Ratio; CAD: Coronary Disease; BMI: body mass index. † Significant p-values for liver density are shown in bold.

**Table S3.** Unadjusted and adjusted odds ratio for each model and variable, **in women only**

|  | **Unadjusted OR** | | | | **Age Adjusted OR** | | | | **Age + BMI adjusted OR** | | | |
| --- | --- | --- | --- | --- | --- | --- | --- | --- | --- | --- | --- | --- |
|  | OR | Lower 95% CI | Higher 95% CI | p-value† | OR | Lower 95% CI | Higher 95% CI | p*-*value† | OR | Lower 95% CI | Higher 95% CI | p*-*value† |
| **CAD** |  |  |  |  |  |  |  |  |  |  |  |  |
| Liver density quartile (1 vs. 4) | 1.971 | 1.221 | 3.612 | **0.03** | 1.923 | 1.046 | 3.533 | **0.04** | 1.832 | 0.978 | 3.429 | 0.06 |
| Age | - | - | - | - | 1.036 | 1.002 | 1.070 | 0.04 | 1.036 | 1.002 | 1.070 | 0.04 |
| BMI | - | - | - | - | - | - | - | - | 1.012 | 0.975 | 1.050 | 0.52 |
| **Diabetes** |  |  |  |  |  |  |  |  |  |  |  |  |
| Liver density quartile (1 vs. 4) | 7.787 | 2.261 | 26.861 | **<0.01** | 7.553 | 2.188 | 26.070 | **<0.01** | 5.173 | 1.455 | 18.396 | **0.01** |
| Age | - | - | - | - | 1.048 | 0993 | 1.105 | 0.09 | 1.051 | 0.996 | 1.110 | 0.07 |
| BMI | - | - | - | - | - | - | - | - | 1.086 | 1.034 | 1.141 | 0.001 |
| **Heart Failure** |  |  |  |  |  |  |  |  |  |  |  |  |
| Liver density quartile (1 vs. 4) | 4.029 | 0.841 | 19.307 | 0.08 | 4.045 | 0.843 | 19.417 | 0.08 | 4.203 | 0.851 | 20.763 | 0.08 |
| Age | - | - | - | - | 0.997 | 0.937 | 1.060 | 0.91 | 0.997 | 0.937 | 1.060 | 0.92 |
| BMI | - | - | - | - | - | - | - | - | 0.991 | 0.921 | 1.066 | 0.81 |
| **Hypertension** |  |  |  |  |  |  |  |  |  |  |  |  |
| Liver density quartile (1 vs. 4) | 1.740 | 1.078 | 2.808 | **0.02** | 1.665 | 1.023 | 2.709 | **0.04** | 1.318 | 0.792 | 2.191 | 0.29 |
| Age | - | - | - | - | 1.057 | 1.030 | 1.085 | <0.001 | 1.057 | 1.030 | 1.085 | <0.001 |
| BMI | - | - | - | - | - | - | - | - | 1.058 | 1.026 | 1.091 | <0.001 |
| **Stroke** |  |  |  |  |  |  |  |  |  |  |  |  |
| Liver density quartile (1 vs. 4) | 2.043 | 0.681 | 6.130 | 0.20 | 2.002 | 0.666 | 6.014 | 0.22 | 2.323 | 0.749 | 7.202 | 0.14 |
| Age | - | - | - | - | 1.024 | 0.964 | 1.087 | 0.44 | 1.025 | 0.965 | 1.088 | 0.43 |
| BMI | - | - | - | - | - | - | - | - | 0.963 | 0.895 | 1.036 | 0.31 |
|  |  |  |  |  |  |  |  |  |  |  |  |  |

OR: Odds Ratio; CAD: Coronary Disease; BMI: body mass index. † Significant p-values for liver density are shown in bold.
